# Supplementary material for: Differential and Synergistic Effects of Low Birth Weight and Western Diet on Skeletal Muscle Vasculature, Mitochondrial Lipid Metabolism and Insulin Signaling in Male Guinea Pigs
Source: MDPI journal article supplement (doi:10.3390/nu13124315), 2021-11-29
Supplement: s1 [file s1]

## Supplementary Tables

**Supplementary Table S1.** Composition of the experimental control diet (CD) and Western diet (WD)

| Item                                            | CD*<br>(TD.110240) | WD*<br>(TD.110239) |
|-------------------------------------------------|--------------------|--------------------|
| Main ingredients (g kg <sup>-1</sup> )          |                    |                    |
| Isolated soy protein                            | 210                | 255                |
| L-METHIONINE                                    | 2.47               | 3                  |
| Sucrose                                         | 100                | 190                |
| Fructose                                        | —                  | 65                 |
| Corn starch                                     | 354                | —                  |
| Maltodextrin                                    | 93                 | 93                 |
| Cellulose                                       | 130                | 130                |
| Soybean oil                                     | 60                 | —                  |
| Cocoa butter                                    | —                  | 50                 |
| Lard                                            | —                  | 55                 |
| Coconut oil                                     | —                  | 95                 |
| Cholesterol                                     | —                  | 2.5                |
| Vitamin Mix Teklad (40060)                      | 10                 | 12.3               |
| Vitamin C, l-ascorbyl-2-polyphosphate (35%)     | 0.61               | 0.75               |
| Folic acid                                      | 0.008              | 0.01               |
| Calcium phosphate dibasic                       | 17.66              | 21.5               |
| Potassium citrate, monohydrate                  | 9.85               | 12                 |
| Magnesium oxide                                 | 2.63               | 3.2                |
| Potassium chloride                              | 3.29               | 4                  |
| Sodium chloride                                 | 1.64               | 2                  |
| Calcium carbonate                               | 4.1                | 5                  |
| Ferric citrate                                  | 0.33               | 0.4                |
| Manganese sulfate, monohydrate                  | 0.164              | 0.2                |
| Zinc carbonate                                  | 0.05               | 0.06               |
| Cupric sulfate                                  | 0.0164             | 0.02               |
| Potassium iodate                                | 0.0008             | 0.001              |
| Chromium potassium sulfate, dodecahydrate       | 0.008              | 0.01               |
| Sodium selenite, pentahydrate                   | 0.0008             | 0.001              |
| Ammonium paramolybdate, tetrahydrate            | 0.0002             | 0.0003             |
| Chemical composition                            |                    |                    |
| Protein (% kcal)                                | 21.6               | 21.4               |
| Fat (% kcal)                                    | 18.4               | 45.3               |
| Carbohydrates (% kcal)                          | 60                 | 33.3               |
| Energy (kcal g <sup>-1</sup> )                  | 3.4                | 4.2                |
| Fatty acid composition (% of total fatty acids) |                    |                    |
| Lauric acid (C12:0)                             | —                  | 23.12              |
| Myristic acid (C14:0)                           | —                  | 8.83               |
| Palmitic acid (C16:0)                           | 11                 | 17.32              |
| Stearic acid (C18:0)                            | 4                  | 13.24              |
| Oleic acid (C18:1 <i>cis</i> 9)                 | 23.5               | 24.4               |
| Linoleic acid (C18:2 <i>n</i> -6)               | 53.4               | 4.2                |
| α-Linoleic acid (C18:3 <i>n</i> -3)             | 8                  | 0.03               |

\*Diets were formulated in the Harlan Laboratories (Madison, WI, USA)

**Supplementary Table S2.** Primers used for analysis of gene expression by qRT-PCR

| Gene           | Accession No.  | Anneal Temp (°C) | Forward Sequence (5'-3') | Reverse Sequence (3'-5') | Efficiency |
|----------------|----------------|------------------|--------------------------|--------------------------|------------|
| <i>VLCAD</i>   | XM_003466183.2 | 59               | CAAACCTGGCAGTGACGGCT     | TTGGTGGGGGTCAGACTGTA     | 91.2%      |
| <i>MCAD</i>    | XM_003479087.2 | 59               | CGAGTTGACCGAACAGCAGA     | CAACAGGCATTTGCCCCAAG     | 94.4%      |
| <i>KT</i>      | XM_003464099.2 | 59               | TAAGGTCCTACGCAGTGGTTG    | CTCCATAAGCCCTCTTCCCAC    | 90.8%      |
| <i>PDK4</i>    | XM_003475111.2 | 59               | GCAGTGGTCCAAGATGCCTT     | TGGTGTTCAACTGTTGCCCT     | 94.2%      |
| <i>CPT1b</i>   | XM_003461559.1 | 59               | AGCTCCCCATTCCATAGCAGA    | CGCTGAGCATTCGTCCTGA      | 96.7%      |
| <i>PGC1α</i>   | XM_003467408.2 | 56               | CAAGACCAGTGAAATGAGGG     | CATCCTTTGGGGTCTTTGAG     | 92.5%      |
| <i>PPARα</i>   | NM_001173004.1 | 56               | AGATCCAGAAAAAGAACCGC     | TTTTGCTTTCTCAGACCTCG     | 91.8%      |
| <i>SIRT1</i>   | XM_005005505.1 | 58               | TTGCAACTGCATCTTGCCCTG    | TCATGGGGTATGGAACTTGGAA   | 103.8%     |
| <i>SIRT3</i>   | XM_004999541.1 | 58               | CATGGCGGATCTGCTACTCA     | AGGCTGCATGTTGTGGTTTG     | 93.8%      |
| <i>β-actin</i> | NM_001172909.1 | 59               | AAGAGATGTGGCCTCAAAGC     | CAGGAACAGGCCGTAGAGTG     | 100.6%     |

**Supplementary Table S3.** Specifications and catalog numbers of antibodies used for immunoblotting

| Protein | Species | Dilution | Blocking | Company | Catalogue |
|---------|---------|----------|----------|---------|-----------|
|---------|---------|----------|----------|---------|-----------|

|                             |                   |          | <b>Solution</b> |                           | <b>No.</b> |
|-----------------------------|-------------------|----------|-----------------|---------------------------|------------|
| IR $\beta$                  | Rabbit Monoclonal | 1:1000   | 5% BSA          | Cell Signaling Technology | 3025       |
| pIR $\beta$ (Tyr 1150/1151) | Rabbit Monoclonal | 1:1000   | 5% BSA          | Cell Signaling Technology | 3024       |
| pAKT (Ser 473)              | Rabbit Monoclonal | 1:1000   | 5% BSA          | Cell Signaling Technology | 4060       |
| pAKT (Thr308)               | Rabbit Monoclonal | 1:1000   | 5% BSA          | Cell Signaling Technology | 2965       |
| PKC $\theta$                | Rabbit Polyclonal | 1:1000   | 5% BSA          | Cell Signaling Technology | 2059       |
| PKC $\epsilon$              | Rabbit Monoclonal | 1:1000   | 5% BSA          | Cell Signaling Technology | 2683       |
| pJNK(Thr183/Tyr185)         | Mouse Monoclonal  | 1:500    | 5% Milk         | Santa Cruz Biotechnology  | sc-6254    |
| JNK                         | Mouse Monoclonal  | 1:500    | 5% Milk         | Santa Cruz Biotechnology  | sc-7345    |
| pIKK $\beta$ (Ser177/181)   | Rabbit Polyclonal | 1:1000   | 5% BSA          | Cell Signaling Technology | 2694       |
| IKK $\beta$                 | Rabbit Polyclonal | 1:1000   | 5% BSA          | Cell Signaling Technology | 2678       |
| pIRS1 (ser302)              | Mouse Monoclonal  | 1:1000   | 5% Milk         | Millipore                 | 05-1086    |
| IRS1                        | Rabbit Monoclonal | 1:1000   | 5% BSA          | Cell Signaling Technology | 2382       |
| Anti-Rabbit Secondary       | Mouse Monoclonal  | 1:10,000 | 5% BSA or Milk  | Cell Signaling Technology | 7074       |
| Anti-Mouse Secondary        | Donkey            | 1:5000   | 5% BSA or Milk  | Cell Signaling Technology | 7076       |
